# Supplementary material
Source: Royal Society of Chemistry journal article supplement (doi:10.1039/d5ta09908k)
Supplement: d5ta09908k1.pdf [file d5ta09908k1.pdf]

## Supplementary Information

### Transformative Binder-Free Strategy Shatters Cyclability Limits for High-Energy Density Oxide Anode-Based Lithium-Ion Batteries

Abhinav Tandon and Yogesh Sharma\*

Abhinav Tandon 1

Department of Physics

IIT Roorkee, Roorkee - 247667

Uttarakhand, India

Yogesh Sharma 2

Department of Physics & Center for Sustainable Energy

IIT Roorkee, Roorkee - 247667

Uttarakhand, India

E-mail: yogesh.sharma@ph.iitr.ac.in

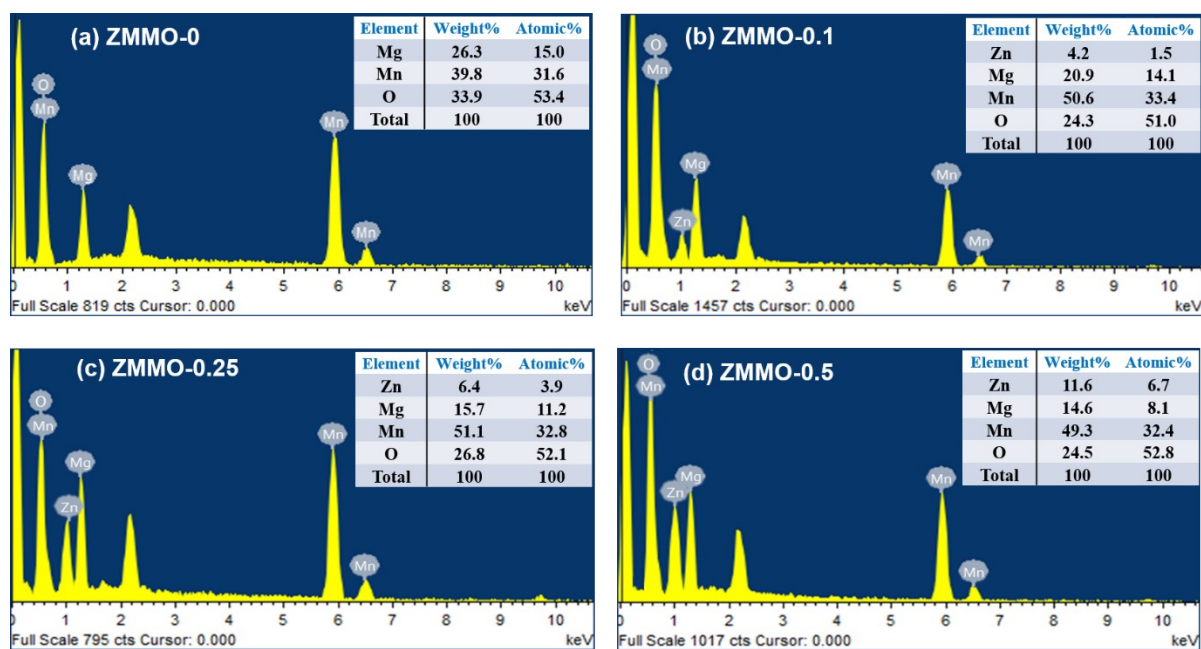

Fig. S1. EDX of Zn<sub>x</sub>Mg<sub>1-x</sub>Mn<sub>2</sub>O<sub>4</sub> (x = 0, 0.1, 0.25, and 0.5) nanofibers.

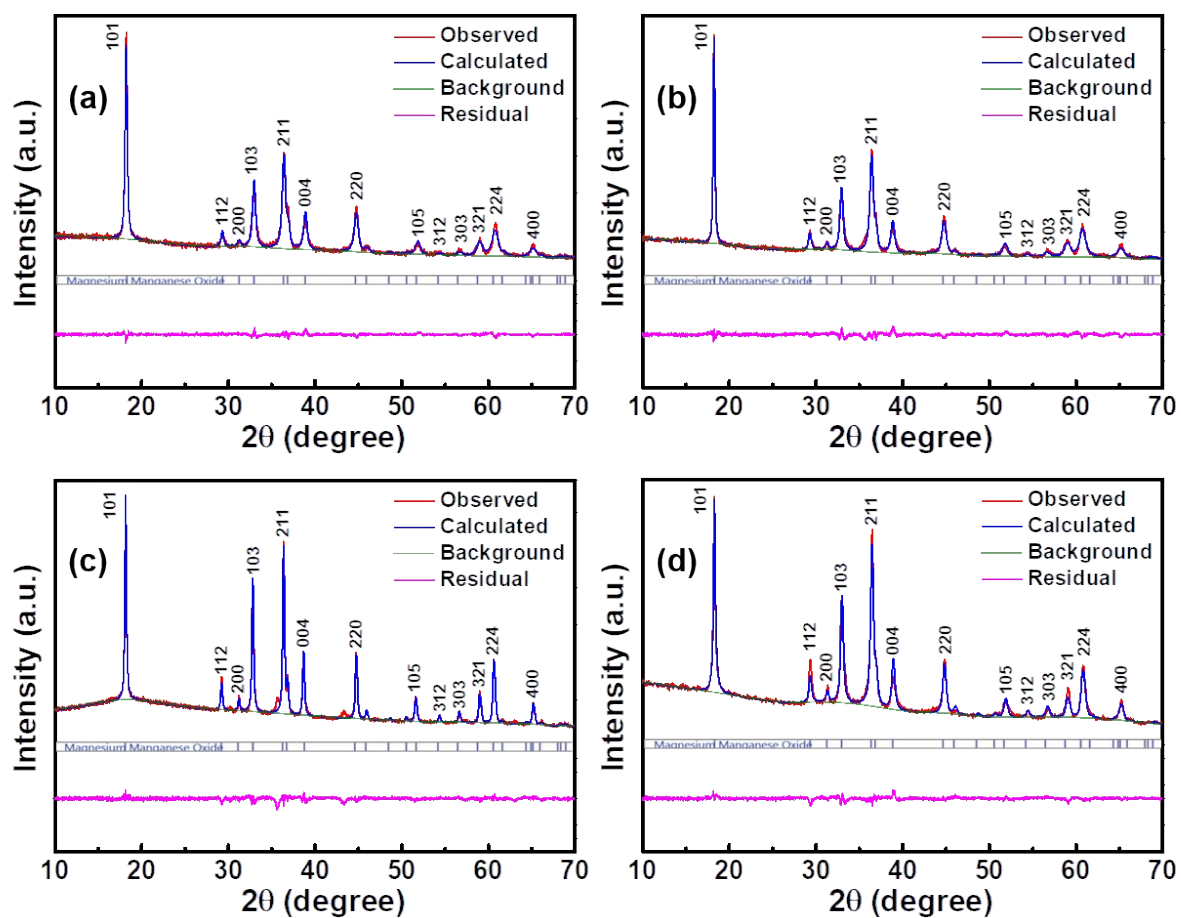

**Fig. S2.** Rietveld refined XRD patterns of (a) ZMMO-0, (b) ZMMO-0.1, (c) ZMMO-0.25 and (d) ZMMO-0.5.

**Table S1.** Refined crystallographic parameters of ZMMO-0 sample:  $a = b = 5.7317(14) \text{ \AA}$ ,  $c = 9.255(2) \text{ \AA}$ ,  $\chi^2$ : 2.16,  $S$ : 1.47,  $R_p$  (%): 4.63,  $R_{wp}$  (%): 6.26, and  $R_{exp}$  (%): 4.25.

| Elements | $x$      | $y$       | $z$       | Occupancy |
|----------|----------|-----------|-----------|-----------|
| O        | 0.000000 | 0.5144(8) | 0.2392(4) | 1.000     |
| Mn       | 0.000000 | 0.000000  | 0.000000  | 1.000     |
| Mg       | 0.000000 | 0.250000  | 0.375000  | 1.000     |

**Table S2.** Refined crystallographic parameters of ZMMO-0.1 sample:  $a = b = 5.731(16) \text{ \AA}$ ,  $c = 9.276(13) \text{ \AA}$ ,  $\chi^2$ : 2.26,  $S$ : 1.50,  $R_p$  (%): 5.18,  $R_{wp}$  (%): 6.91, and  $R_{exp}$  (%): 4.59.

| Elements | $x$      | $y$        | $z$       | Occupancy |
|----------|----------|------------|-----------|-----------|
| O        | 0.000000 | 0.5013(10) | 0.2458(6) | 1.000     |
| Mn       | 0.000000 | 0.000000   | 0.000000  | 1.000     |
| Mg       | 0.000000 | 0.250000   | 0.375000  | 1.000     |

**Table S3.** Refined crystallographic parameters of ZMMO-0.25 sample:  $a = b = 5.734(10) \text{ \AA}$ ,  $c = 9.283(15) \text{ \AA}$ ,  $\chi^2$ : 2.09,  $S$ : 1.44,  $R_p$  (%): 5.29,  $R_{wp}$  (%): 6.98, and  $R_{exp}$  (%): 4.82.

| Elements | $x$      | $y$       | $z$       | Occupancy |
|----------|----------|-----------|-----------|-----------|
| O        | 0.000000 | 0.5131(7) | 0.2381(4) | 1.000     |
| Mn       | 0.000000 | 0.000000  | 0.000000  | 1.000     |
| Mg       | 0.000000 | 0.250000  | 0.375000  | 1.000     |

**Table S4.** Refined crystallographic parameters of ZMMO-0.5 sample:  $a = b = 5.738(6) \text{ \AA}$ ,  $c = 9.297(10) \text{ \AA}$ ,  $\chi^2$ : 2.42,  $S$ : 1.55,  $R_p$  (%): 3.93,  $R_{wp}$  (%): 5.54, and  $R_{exp}$  (%): 3.56.

| Elements | $x$      | $y$       | $z$       | Occupancy |
|----------|----------|-----------|-----------|-----------|
| O        | 0.000000 | 0.5145(6) | 0.2478(3) | 1.000     |
| Mn       | 0.000000 | 0.000000  | 0.000000  | 1.000     |
| Mg       | 0.000000 | 0.250000  | 0.375000  | 1.000     |

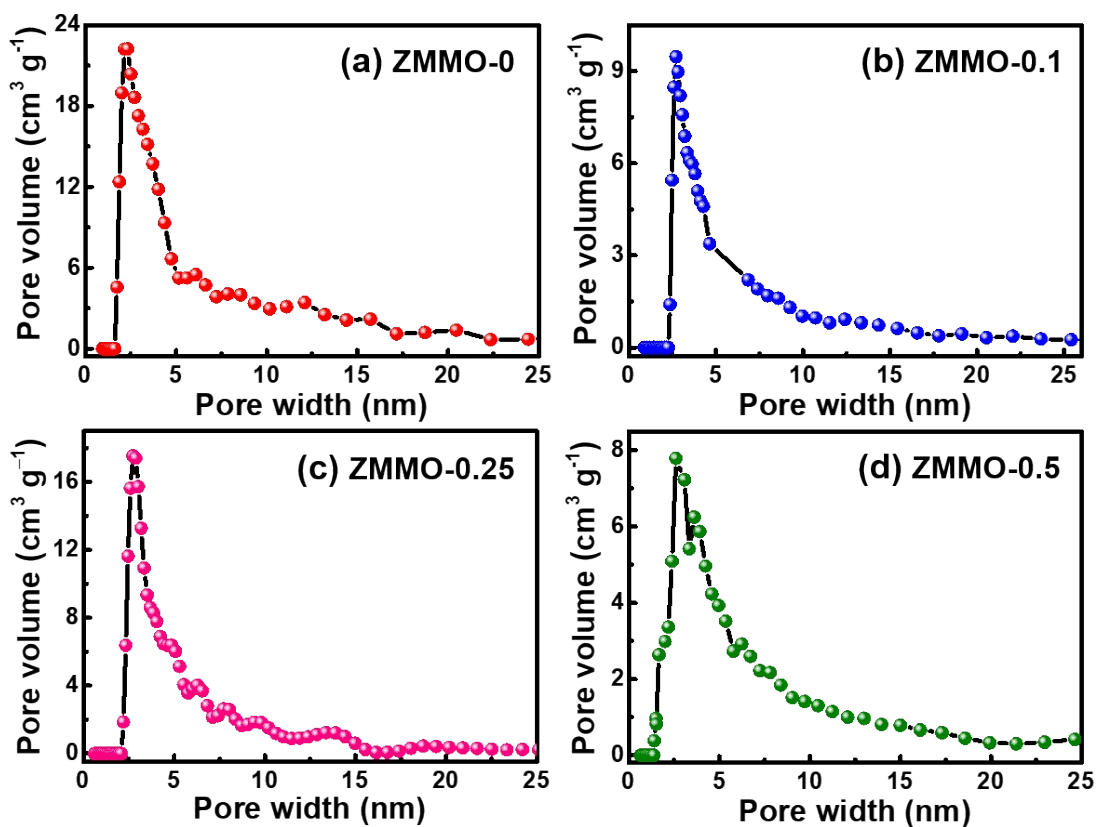

**Fig. S3.** Pore size distribution (PSD) of  $Zn_xMg_{1-x}Mn_2O_4$  ( $x = 0, 0.1, 0.25,$  and  $0.5$ ) nanofibers.

**Table S5.** Findings of  $N_2$  adsorption/desorption isotherm analyses.

| Material  | Specific surface area<br>( $m^2 g^{-1}$ ) | Total pore volume<br>( $cc/g$ ) | Average pore size<br>( $nm$ ) |
|-----------|-------------------------------------------|---------------------------------|-------------------------------|
| ZMMO-0    | 70                                        | 0.094                           | 2.335                         |
| ZMMO-0.1  | 74                                        | 0.047                           | 2.735                         |
| ZMMO-0.25 | 68                                        | 0.043                           | 2.604                         |
| ZMMO-0.5  | 63                                        | 0.044                           | 2.712                         |

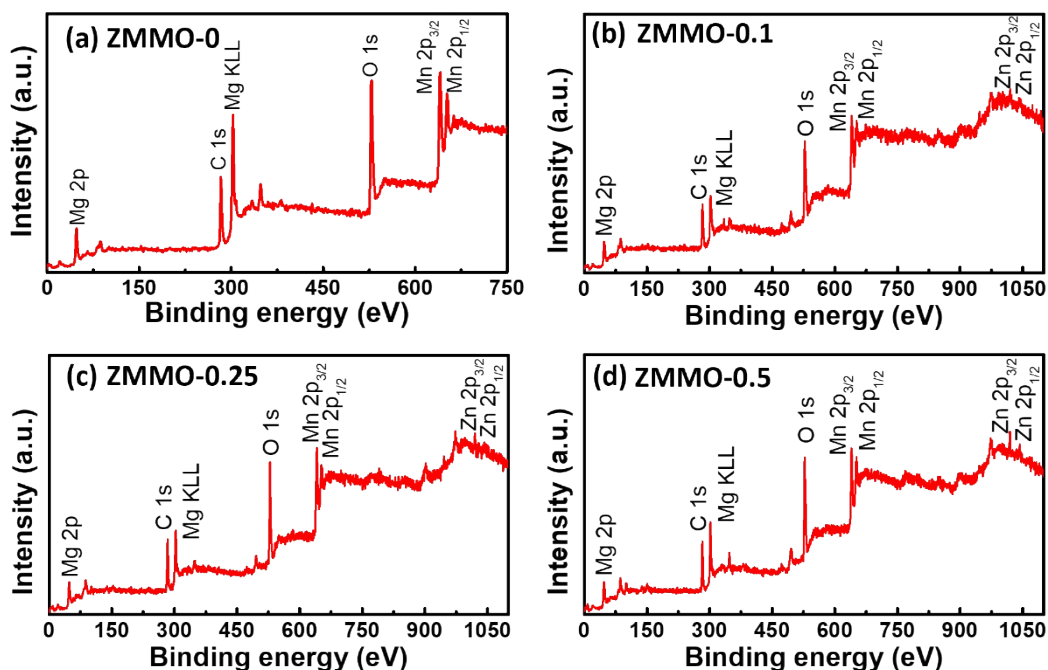

**Fig. S4.** XPS survey spectrum of (a) ZMMO-0, (b) ZMMO-0.1, (c) ZMMO-0.25, and (d) ZMMO-0.5 nanofibers.

The Mg 2p high-resolution XPS spectra for the ZMMO nanofiber samples, shown in Fig. S5a-d, indicate the presence of Mg<sup>2+</sup> ions around 50.92 eV.<sup>1,2</sup> Similarly, Fig. S5e-h presents the high-resolution Mn 2p spectra for the fabricated samples. These spectra display two spin-orbit doublets, with Mn 2p<sub>1/2</sub> at 653.33 eV and Mn 2p<sub>3/2</sub> at 641.77 eV, separated by a spin-orbit splitting of approximately 11.56 eV. In the Gaussian-fitted Mn 2p spectra, the peaks were attributed to Mn<sup>3+</sup> (641.2, 652.6 eV) and Mn<sup>2+</sup> (642.5, 654.1 eV) oxidation states, respectively.<sup>3,4</sup> High-resolution O 1s XPS spectra for all as-fabricated samples, as illustrated in Fig. S5i-l, reveal three distinct peaks. The peaks at binding energies of 529.54 and 531.70 eV correspond to lattice oxygen (O<sub>L</sub>) and vacancy sites/oxygen defects (O<sub>d</sub>), respectively. The third peak, observed at 533.34 eV, is associated with oxygen atoms in surface-adsorbed water molecules (O<sub>w</sub>).<sup>5,6</sup> In the Zn 2p spectrum shown in Fig. S5(m-o), two peaks appear at binding energies of 1020.65 eV and 1043.92 eV, which are attributed to Zn 2p<sub>3/2</sub> and Zn 2p<sub>1/2</sub>, respectively. This peak separation of approximately 23 eV confirms the oxidation state of Zn

in the ZMMO. This binding energy difference aligns well with reported values for  $\text{Zn}^{2+}$  species.<sup>7,8</sup> Collectively, these XPS findings support the successful formation of pure-phase ZMMO nanofibers.

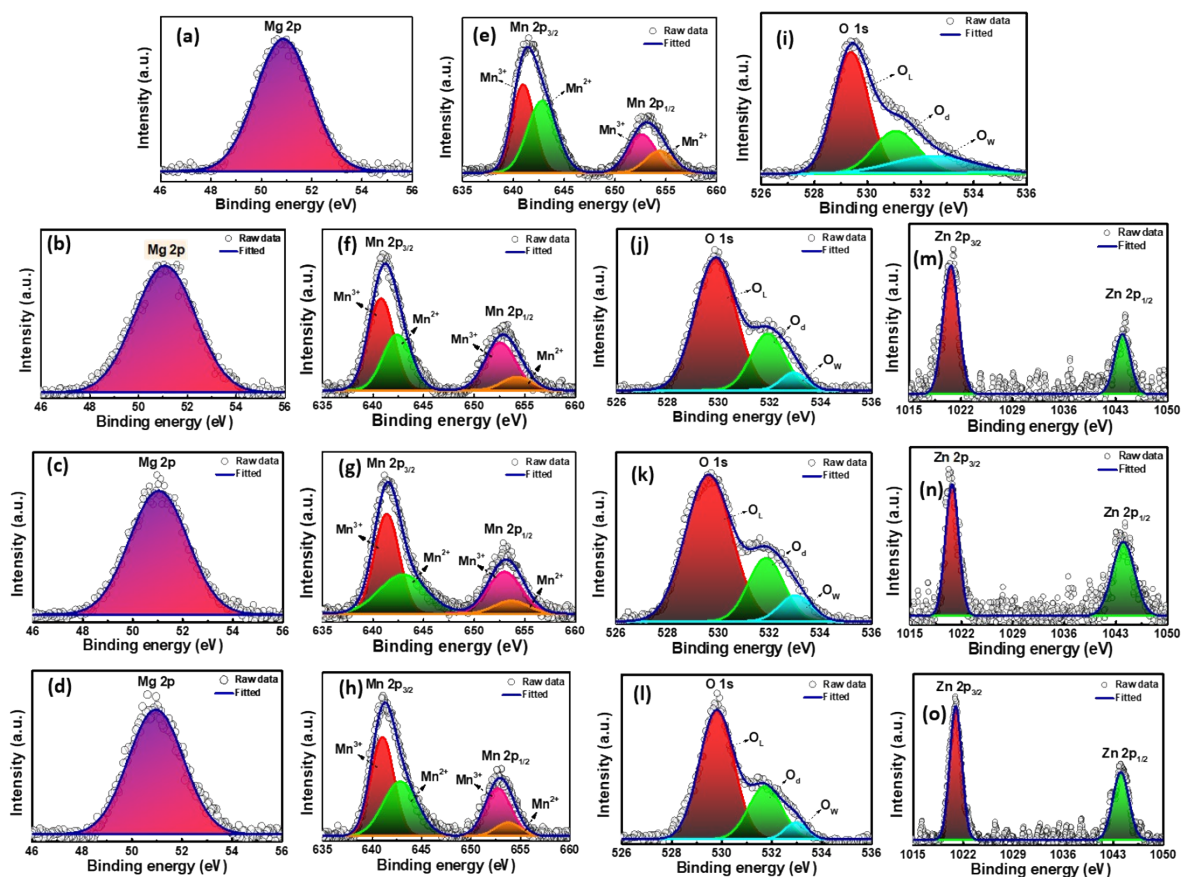

**Fig. S5.** High-resolution XPS spectra of (a-d) Mg 2p, (e-h) Mn 2p, (i-l) O 1s, and (m-o) Zn 2p of ZMMO-0, ZMMO-0.1, ZMMO-0.25, and ZMMO-0.5 nanofibers, respectively.

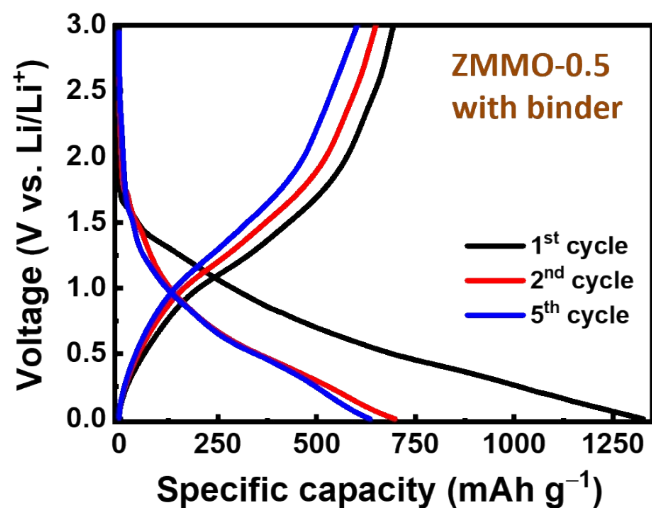

**Fig. S6.** GCD curves of the ZMMO-0.5 nanofiber electrode prepared via a conventional slurry-coating method with a binder.

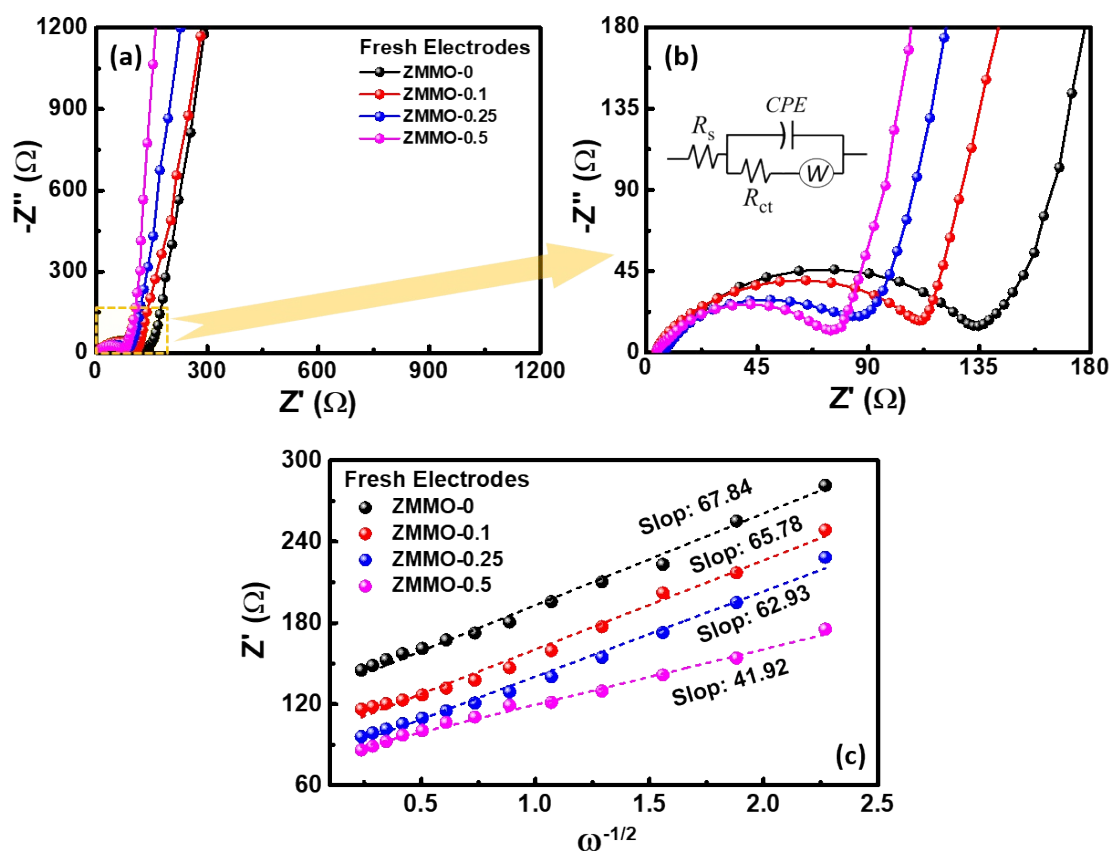

**Fig. S7.** (a) Nyquist plots, (b) zoomed-in Nyquist plots, and (c) linear fitting relationships of the  $Z' - \omega^{-1/2}$  plots of ZMMO-0, ZMMO-0.1, ZMMO-0.25, and ZMMO-0.5 fresh electrodes.

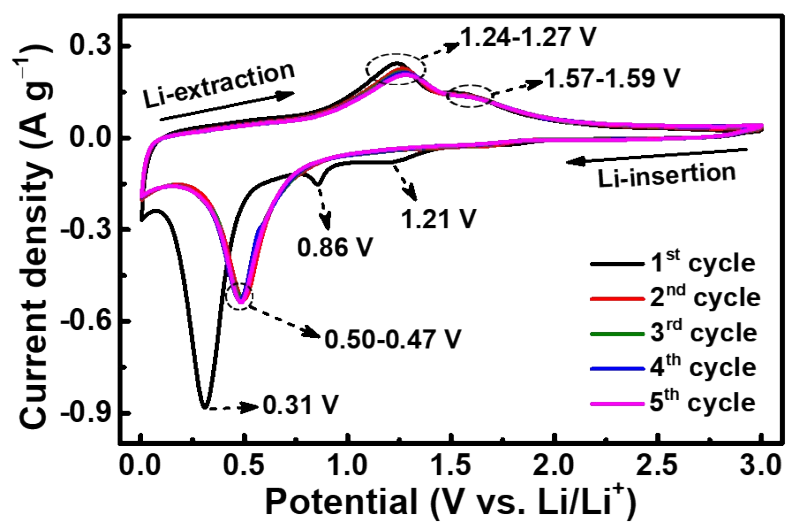

**Fig. S8.** Cyclic voltammetry of ZMMO-0.5 nanofibers electrode at  $0.1 \text{ mV s}^{-1}$  scan rate.

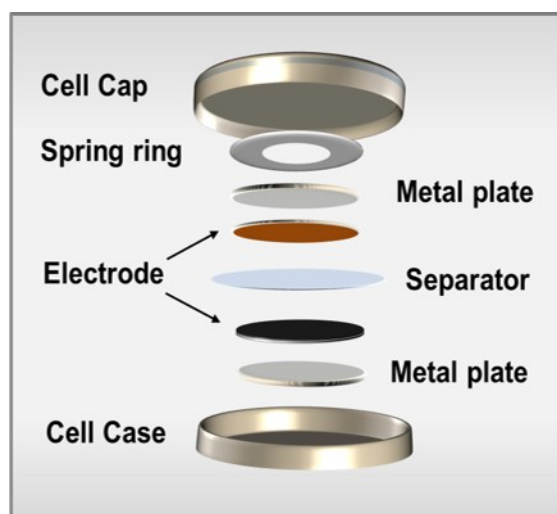

**Fig. S9.** Schematic illustration of full-cell assembly steps.

**Table S6:** Comparative Performance of ZMMO-0.5 Electrode with Literature Data.

| Material composition                                                                        | Li-storage characteristics<br>[capacity (mAh g <sup>-1</sup> ) @no.<br>of cycles @current density] | Rate performance<br>(mAh g <sup>-1</sup> ) | Ref.         |
|---------------------------------------------------------------------------------------------|----------------------------------------------------------------------------------------------------|--------------------------------------------|--------------|
| N-doped carbon encapsulated<br>Mn <sub>2</sub> O <sub>3</sub> /MnO                          | 683.6 @1000 @0.5 A g <sup>-1</sup>                                                                 | 660 @1.6 A g <sup>-1</sup>                 | 9            |
| Mn <sub>x</sub> O <sub>y</sub> -derived metal-organic<br>frameworks                         | 520 @70 @0.1 A g <sup>-1</sup>                                                                     | 441 @1 A g <sup>-1</sup>                   | 10           |
| Mn <sub>2</sub> O <sub>3</sub> nanoparticles<br>embedded into N-doped<br>carbon             | 559 @500 @0.5 A g <sup>-1</sup>                                                                    | 520 @1.2 A g <sup>-1</sup>                 | 11           |
| β-Mn <sub>2</sub> V <sub>2</sub> O <sub>7</sub> nanorods                                    | 253 @100 @0.5 A g <sup>-1</sup>                                                                    | 222 @2.5 A g <sup>-1</sup>                 | 12           |
| Mn <sub>3</sub> O <sub>4</sub> NRs/rGO                                                      | 669 @100 @0.1 A g <sup>-1</sup>                                                                    | -                                          | 13           |
| ZnMn <sub>2</sub> O <sub>4</sub> -rGO/CNTs                                                  | 606 @1000 @1 A g <sup>-1</sup>                                                                     | 94 @5 A g <sup>-1</sup>                    | 14           |
| MnO@Mn <sub>2</sub> O <sub>3</sub> nanocrystals<br>embedded in biochar                      | 446.9 @200 @0.5 A g <sup>-1</sup>                                                                  | @2 A g <sup>-1</sup>                       | 15           |
| CuMn <sub>2</sub> O <sub>4</sub> /graphene<br>nanosheets                                    | 935 @150 @0.05 A g <sup>-1</sup>                                                                   | 478 @1 A g <sup>-1</sup>                   | 16           |
| Graphene coated core-shell<br>Mn <sub>3</sub> O <sub>4</sub> nanoparticles                  | 353 @50 @0.1 A g <sup>-1</sup>                                                                     | 374 @0.5 A g <sup>-1</sup>                 | 17           |
| CoMn <sub>2</sub> O <sub>4</sub> microflowers                                               | 650 @500 @1 A g <sup>-1</sup>                                                                      | 257 @2 A g <sup>-1</sup>                   | 18           |
| Zn <sub>0.5</sub> Mg <sub>0.5</sub> Mn <sub>2</sub> O <sub>4</sub> nanofibers<br>(ZMMO-0.5) | 874 @400 @1 A g <sup>-1</sup><br>186 @2000 @2.5 A g <sup>-1</sup>                                  | 108 @5 A g <sup>-1</sup>                   | This<br>work |

**Table S7:** Electrode parameters and calculated cell metrics of the NCM//ZMMO-0.5 full cell.

| Cell Parameter                           | Values         |             |
|------------------------------------------|----------------|-------------|
|                                          | ZMMO-0.5 Anode | NCM Cathode |
| Mass loading (mg cm <sup>-2</sup> )      | 0.25           | 1.5         |
| Total electrode mass (mg)                | 0.50           | 3.00        |
| Coating thickness (μm)                   | 12             | 30          |
| True density (g cm <sup>-3</sup> )       | 4.494          | 4.587       |
| Compaction density (g cm <sup>-3</sup> ) | 0.208          | 0.50        |
| Theoretical porosity (%)                 | 95.4           | 89.1        |
| Pore volume (cm <sup>3</sup> )           | 0.00229        | 0.00534     |
| Electrolyte absorbed (mg)                | 4.126          | 9.623       |
| Separator dry mass (mg)                  |                | 2.86        |
| Separator electrolyte (mg)               |                | 5.218       |
| Total electrolyte mass (mg)              |                | 18.97       |
| Cu current collector (mg)                |                | 17.44       |
| Al current collector (mg)                |                | 8.43        |
| Total cell mass (mg)                     |                | 51.20       |
| Average working voltage (V)              |                | 2.54        |
| Discharge capacity (mAh)                 |                | 0.313       |
| Cell energy (mWh)                        |                | 0.795       |

## References

1. X. Wang, G. Zhai and H. Wang, *J Nanopart Res*, 2015, **17**, 339.
2. W. N. R. W. Isahak, S. Z. Hasan, Z. A. C. Ramli, M. M. Ba-Abbad and M. A. Yarmo, *Res Chem Intermed*, 2019, **45**, 951–953.
3. C. Si, J. Zhang, Y. Wang, W. Ma, H. Gao, L. Lv and Z. Zhang, *ACS Appl. Mater. Interfaces*, 2017, **9**, 2485–2494.
4. B. Pattanayak, F. M. Simanjuntak, D. Panda, C.-C. Yang, A. Kumar, P. – A. Le, K. – H. Wei and T. –Yuen Tseng, *Sci Rep*, 2019, **9**, 16852.
5. J. J. William, I. M. Babu and G. Muralidharan, *New J. Chem.*, 2019, **43**, 15375–15388.
6. Z.-F. Huang, S. Xi, J. Song, S. Dou, X. Li, Y. Du, C. Diao, Z. J. Xu and X. Wang, *Nat Commun*, 2021, **12**, 3992.
7. Y. Wang, S. Xu, Y. Zhang, L. Hou and C. Yuan, *Nanomaterials*, 2023, **13**, 512.
8. J. Chen, H. Zuo, C. Wang, Y.-C. Zhang, W. Gao, N. Zhao, Y. Huang and S. Xiao, *Electrochimica Acta*, 2022, **426**, 140780.
9. X. Liu, Y. Liu, M. Jin, C. Xu, Y. Tian, M. Zhou, W. Wang, G. Li, Z. Hou and L. Chen, *Journal of Colloid and Interface Science*, 2024, **665**, 752–763.
10. T. B. N. Le, H. T. Lai, T. L. Nguyen, Q. N. Tran, N. Q. M. Tran, L. H. T. Nguyen, T. L. H. Doan, A. T. T. Pham, C. K. Jayasankar, B. Jang, J. Hong and T. B. Phan, *Solid State Sciences*, 2024, **151**, 107504.
11. L. Chen, Y. Liu, L. Yang, C. Xu, W. Wang, G. Li, Y. Zhu, M. Zhou and Z. Hou, *Chemical Engineering Science*, 2024, **285**, 119626.
12. T. L. Soundarya, M. Jayachandran, T. Maiyalagan, B. Nirmala, G. Nagaraju and H. N. Anil Rao, *Journal of Energy Storage*, 2024, **85**, 111076.
13. Y. Liu, W. Wang, Y. Wang, Y. Ying, L. Sun and X. Peng, *RSC Adv.*, 2014, **4**, 16374.
14. Q. Tang, Y. Shi, Z. Ding, T. Wu, J. Wu, V. Mattick, Q. Yuan, H. Yu and K. Huang, *Electrochimica Acta*, 2020, **338**, 135853.
15. Y. Li, X. Xu, Y. Tang, Y. Sima, J. Yang, P. Lu, X. Liu, S. Xu, W. Yin, J. Zhao, S. Shi, H. Ji, Z. Chen and G. Yang, *Surfaces and Interfaces*, 2024, **49**, 104424.
16. L. Li, G. Jiang and J. Ma, *Materials Research Bulletin*, 2018, **104**, 53–59.
17. Thauer, X. Shi, S. Zhang, X. Chen, L. Deeg, R. Klingeler, K. Wenelska and E. Mijowska, *Energy*, 2021, **217**, 119399.
18. L. Zhang, G. He, S. Lei, G. Qi, H. Jiu and J. Wang, *Journal of Power Sources*, 2016, **326**, 505–513.
